# Supplementary material
Source: publisher figshare collection journal article supplement (https://acs.figshare.com/ndownloader/files/4266136)
Supplement: Supplementary file 1 [file 4266136]

## Supporting Information

### Two-step synthesis of nanoflowers with a narrow size distribution using a tree-type multi-amine head surfactant as a template

*Wenfeng Jia, Jinru Li, Guanhua Lin, and Long Jiang\**

Beijing National Laboratory for Molecular Sciences, Key Laboratory of Colloids and Surfaces, Institute of Chemistry, Chinese Academy of Sciences, Beijing 100190, People's Republic of China

E-mail: [jiangl@iccas.ac.cn](mailto:jiangl@iccas.ac.cn)

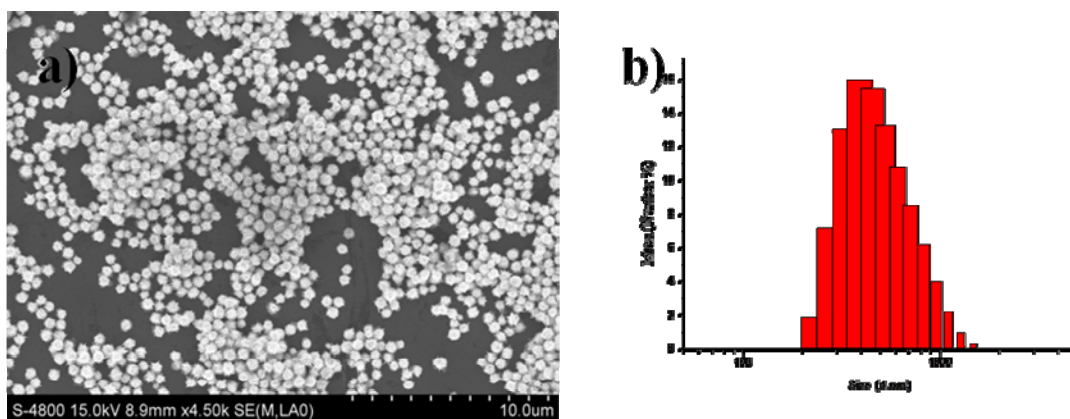

Figure S1. (a) SEM images, (b) Histograms indicating the particles size distribution

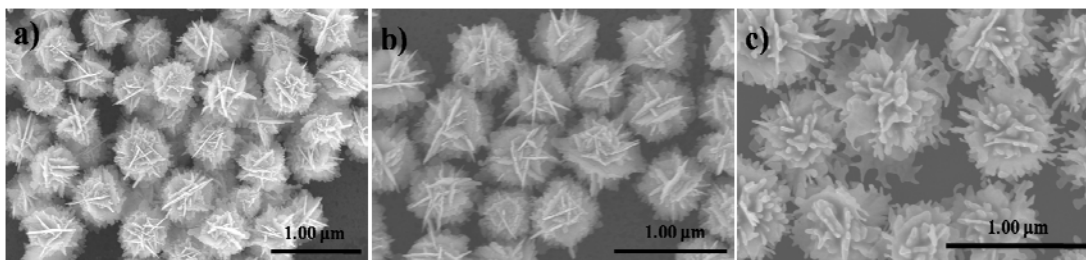

Figure S2. (a) SEM images of Au nanostructures were obtained under optimal conditions: (a) normal Au nanostructures, (b) after three months, (c) after absorbing R6G.

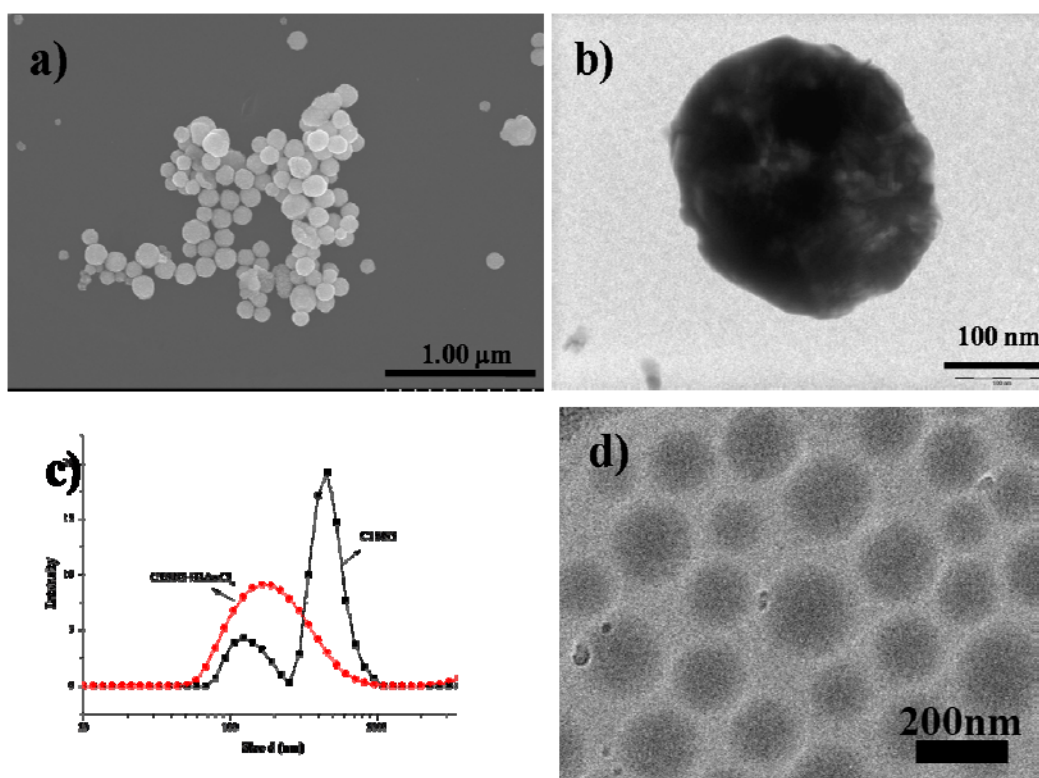

Figure S3. Representative SEM (a) and TEM (b) images of particles with  $\text{HAuCl}_4$  (0.54 mM) and C18N3 (0.5 mM), reduced by AA (0.2 mL, 20 mM); (c) DLS of C18N3 and C18N3- $\text{HAuCl}_4$  complexes, respectively; (d) a cryo-TEM image of the vesicles of C12N3, a molecule has shorter hydrophobic chain in the CXN3 family.

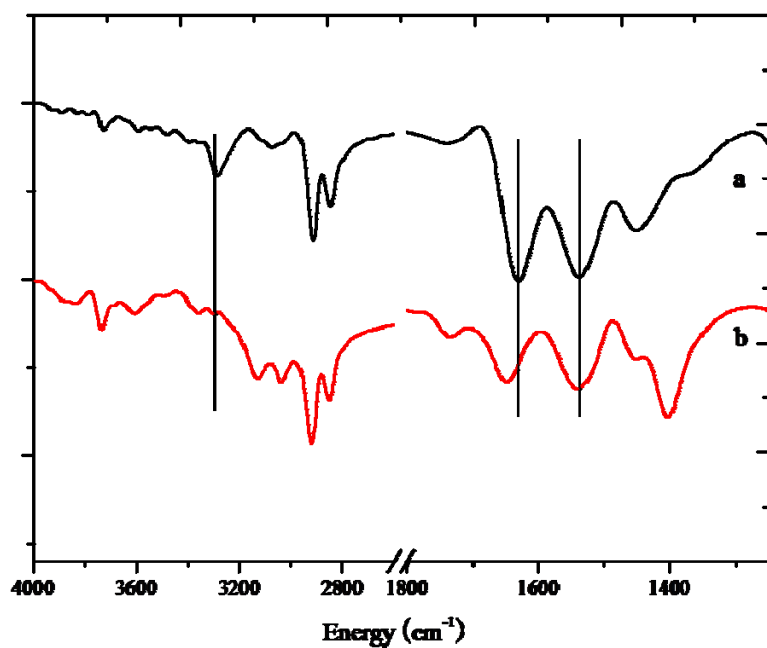

Figure S4. (a) C18N3; (b) C18N3/HAuCl<sub>4</sub> complexes. The 3300 cm<sup>-1</sup> peak assigned to –NH<sub>2</sub> and 1640<sup>-1</sup> peak assigned amide group has been moved after complexation.

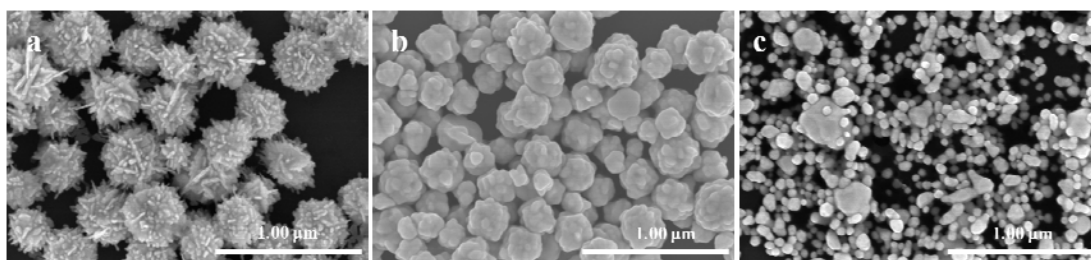

Figure S5. SEM images of Au nanostructures were obtained from an aqueous solution of HAuCl<sub>4</sub> (1.6 mM) and AA (0.2 mL, 20 mM) with varying C18N3 concentrations: (a) 0.05 mM, (b) 0.01 mM, (c) 0 mM.

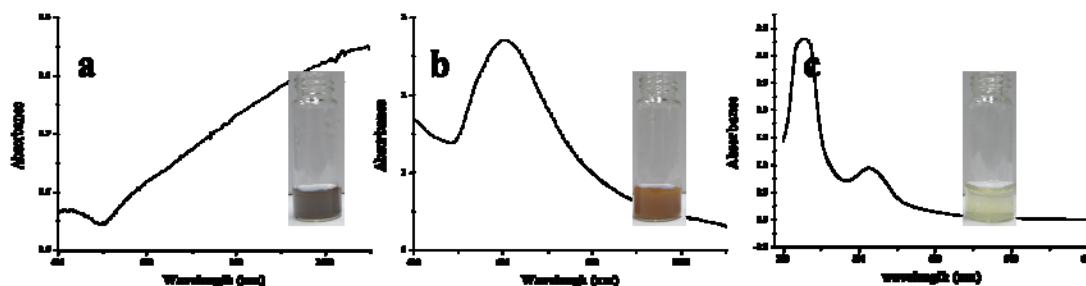

Figure S6. UV-vis spectra of (a) flower-like gold particles synthesized by the reduction of  $\text{HAuCl}_4$  (1.45 mM) in an aqueous C18N3 solution (0.5 mM), with AA (0.2 mL, 20 mM), (b) nanoparticles prepared by  $\text{HAuCl}_4$  (1.45 mM) in an aqueous solution of AA (0.2 mL, 20 mM), and c) complexes of  $\text{HAuCl}_4$  (1.45 mM) and C18N3 (0.5 mM).

Table S1. The pH of different concentrations of C18N3 with a constant  $\text{HAuCl}_4$  (1.45 mM) concentration in aqueous solutions.

| C/ mM | 0   | 0.1 | 0.3 | 0.5 | 0.7 | 0.9 |
|-------|-----|-----|-----|-----|-----|-----|
| pH    | 2.4 | 2.6 | 2.6 | 2.6 | 2.6 | 2.6 |

The calculation of enhancement factor (EF) is as follows:

To determine the enhancement effect of R6G on the self-assembled film and single particles, the (EF) values of R6G were calculated by following expression:<sup>1</sup>

$$\text{EF} = (I_{\text{SERS}} / N_{\text{ads}}) / (I_{\text{bulk}} / N_{\text{bulk}})$$

Where  $I_{\text{SERS}}$  is the intensity of a vibrational mode in the surface enhanced spectrum,  $I_{\text{bulk}}$  is the intensity of the same mode in the Raman spectrum,  $N_{\text{ads}}$  is the number of molecules adsorbed and sampled on the SERS-active substrate, and  $N_{\text{bulk}}$  is the number of molecules sampled in the bulk.

The EF of flower-like particles can be calculated to be about  $10^5$ - $10^6$ .

- (1) Guo, S.; Dong, S.; Wang, E. *Cryst Growth Des* **2008**, 9, 372.
